# Supplementary material for: Control of the structural landscape and neuronal proteotoxicity of mutant Huntingtin by domains flanking the polyQ tract
Source: eLife journal article supplement (doi:10.7554/elife.18065), 2016-10-18
Supplement: supp [file elife_poa_e18065_Figure_1_figure_supplement_1.pdf › elife_poa_e18065_Figure_1_figure_supplement_1.pdf]

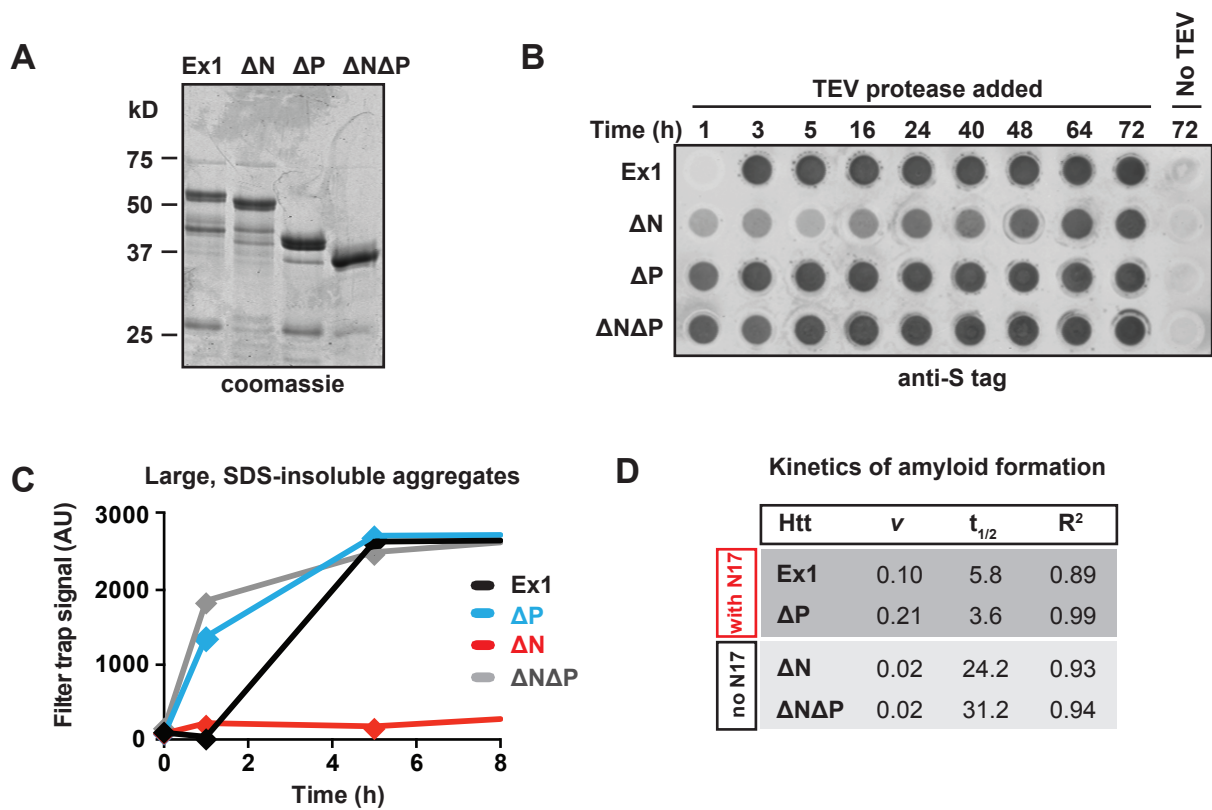

**Figure 1 - figure supplement 1: *In vitro* aggregation kinetics of mHtt variants**

**A.** Coomassie stained gel of recombinantly purified mHtt variants. Mutants were purified using a solubilizing N-terminal GST tag.

**B.** Immunoblot from the filter trap assay of SDS-insoluble, heat-stable aggregates from the mHtt variants. mHtt variants were detected using the C-terminal S-tag.

**C.** Close-up of the first 10h of filter trap aggregation assay as shown in (Fig 1B). Data is representative of at least three independent experiments.

**D.** Kinetic coefficients of amyloid aggregation from fitting a Finke-Watzky amyloid kinetic model to the normalized ThioflavinT data (Fig 1D).  $t_{1/2}$  represents half-time to aggregation saturation.  $v$  represents the elongation rate of aggregation at  $t_{1/2}$ . Without N17, aggregation is significantly slowed down.
