# Supplementary material for: Control of the structural landscape and neuronal proteotoxicity of mutant Huntingtin by domains flanking the polyQ tract
Source: eLife journal article supplement (doi:10.7554/elife.18065), 2016-10-18
Supplement: supp [file elife_poa_e18065_Figure_2_figure_supplement_1.pdf › elife_poa_e18065_Figure_2_figure_supplement_1.pdf]

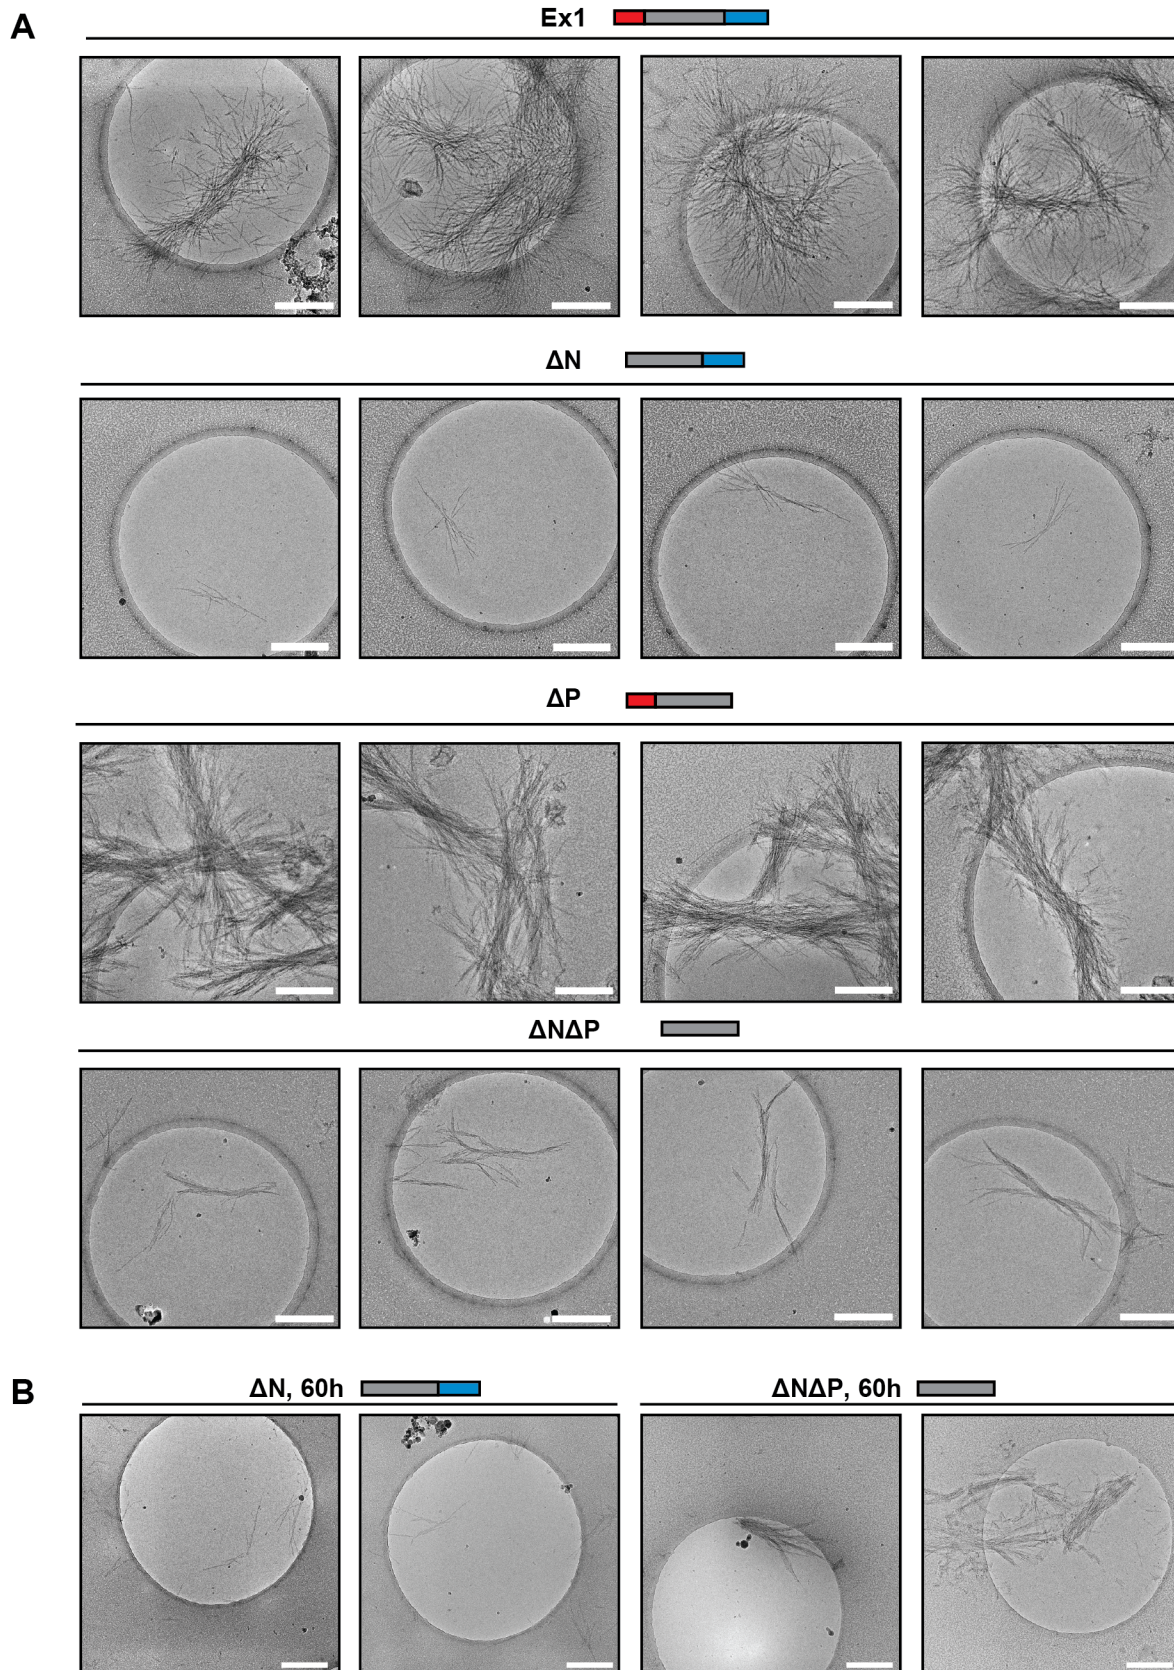

**Figure 2 - figure supplement 1: Cryo-EM imaging of mHtt variants**

**A.** Images of fiber aggregate morphology from each of the mHtt variants by cryo-EM. mHtt fibers were imaged 24h post initiation of aggregation. Scale bar is 500 nm.

**B.** Morphology of  $\Delta N$  and  $\Delta N\Delta P$  at 60h post initiation of aggregation. Scale bar is 500 nm. Longer incubation for aggregation does not change the fibril morphology and only leads to more aggregates. Scale bar is 500 nm.
