# Supplementary material for: Control of the structural landscape and neuronal proteotoxicity of mutant Huntingtin by domains flanking the polyQ tract
Source: eLife journal article supplement (doi:10.7554/elife.18065), 2016-10-18
Supplement: supp [file elife_poa_e18065_Figure_2_figure_supplement_2.pdf › elife_poa_e18065_Figure_2_figure_supplement_2.pdf]

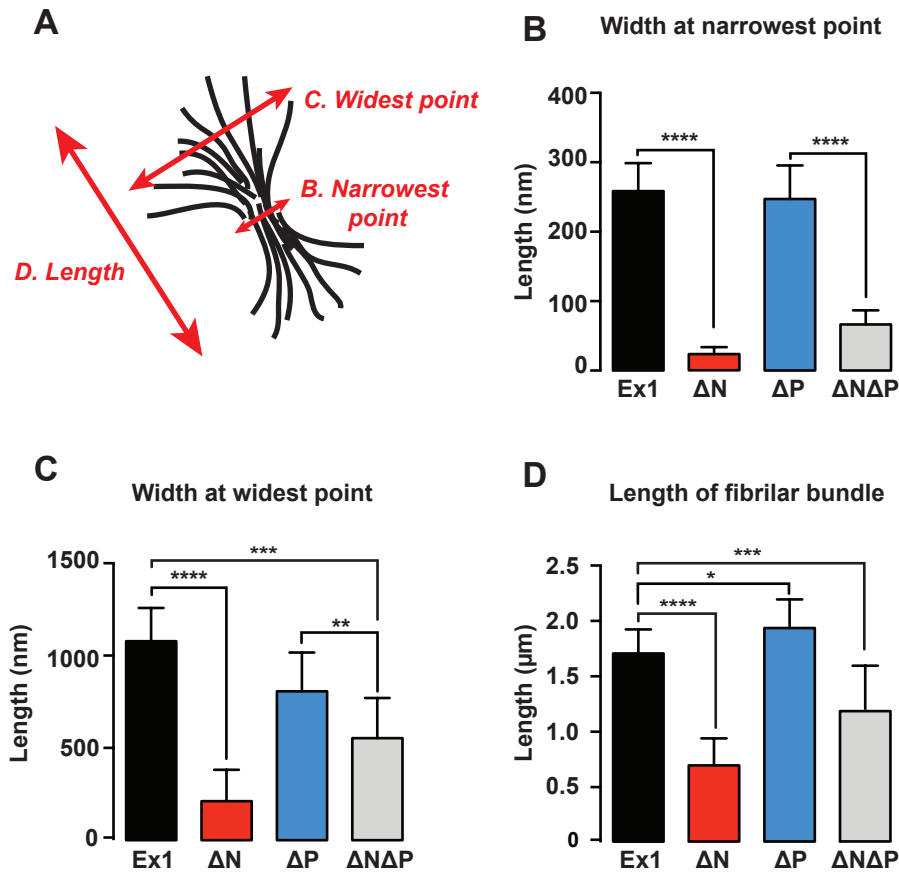

**Figure 2 - figure supplement 2: Quantification of Cryo-EM imaging of mHtt variants**

**A.** Schematic of parameters measured for the mHtt fibers of the cryo-EM images. Unit is in nanometers. \*  $p < 0.05$ ; \*\*  $p < 0.01$ ; \*\*\*  $p < 0.001$ ; \*\*\*\*  $p < 0.0001$ . p-values measured by Student's t-test. Parameters were measured from at least 10 individual fibril.

**B.** Width of fibers at the narrowest point, indicating overall thickness and extent of packing for each fibrillar structure.

**C.** Width of fibers at the widest point, indicating both overall thickness and extent of branched fibrillar structure.

**D.** Total length of fibers, indicating total fibrillar growth length-wise.
