# Supplementary material for: Control of the structural landscape and neuronal proteotoxicity of mutant Huntingtin by domains flanking the polyQ tract
Source: eLife journal article supplement (doi:10.7554/elife.18065), 2016-10-18
Supplement: supp [file elife_poa_e18065_Figure_3_figure_supplement_1.pdf › elife_poa_e18065_Figure_3_figure_supplement_1.pdf]

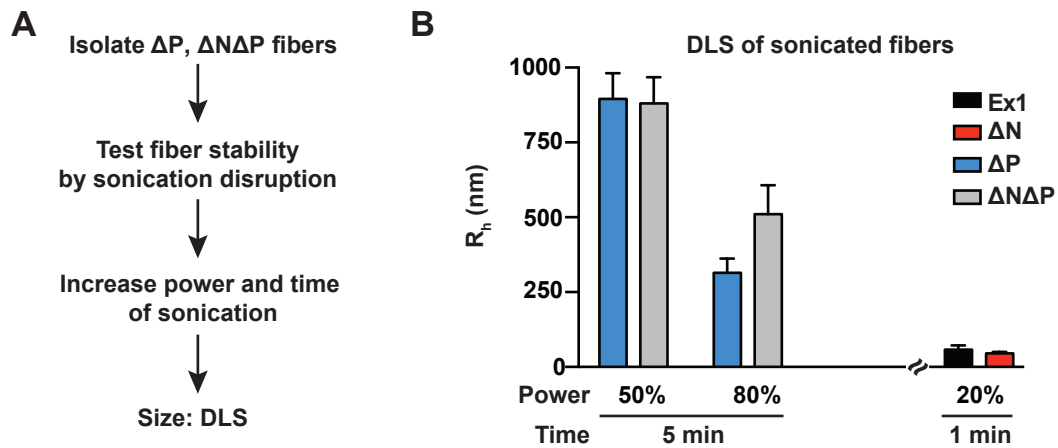

**Figure 3 - figure supplement 1:  $\Delta P$  and  $\Delta N\Delta P$  resist mechanical disruption even under harsher sonication conditions**

**A.** Sonication of  $\Delta P$ ,  $\Delta N\Delta P$  fibers with increased power and time of sonication compared to those conditions in Fig 3. Size of sonicated species was analyzed by Dynamic Light Scattering (DLS).

**B.** DLS size comparisons of  $\Delta P$  and  $\Delta N\Delta P$  sonicated species after sonication with increased power (50%, 80%) and time (5 min). Size of Ex1 and  $\Delta N$  fibers sonicated under the original sonication conditions (20% power, 1 min) as shown in Fig 3B are replicated here for comparison. Data are mean  $\pm$  SEM.
