# Supplementary material for: Control of the structural landscape and neuronal proteotoxicity of mutant Huntingtin by domains flanking the polyQ tract
Source: eLife journal article supplement (doi:10.7554/elife.18065), 2016-10-18
Supplement: supp [file elife_poa_e18065_Figure_3_figure_supplement_2.pdf › elife_poa_e18065_Figure_3_figure_supplement_2.pdf]

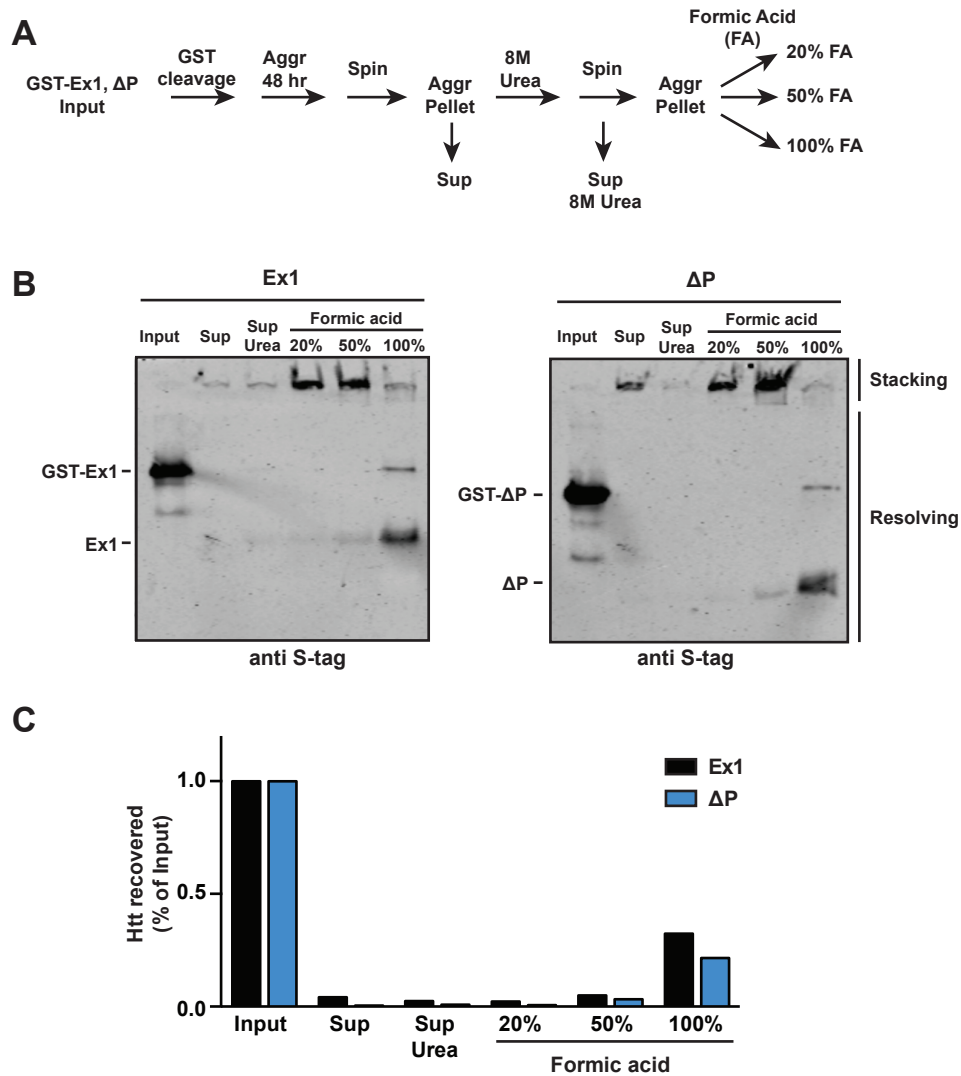

**Figure 3 - figure supplement 2: Stability of Ex1 and  $\Delta$ P aggregates to urea and formic acid**

**A.** Schematic of urea and formic acid treatment on Ex1 and  $\Delta$ P aggregates

**B.** SDS-PAGE gel showing soluble material during each of the treatments. Stacking gel was also transferred to demonstrate insoluble material that did not enter the SDS-PAGE gel.

**C.** Quantification of (B), normalized to signal of Input sample for both Ex1 and  $\Delta$ P.
