# Supplementary material for: Control of the structural landscape and neuronal proteotoxicity of mutant Huntingtin by domains flanking the polyQ tract
Source: eLife journal article supplement (doi:10.7554/elife.18065), 2016-10-18
Supplement: supp [file elife_poa_e18065_Figure_4_figure_supplement_1.pdf › elife_poa_e18065_Figure_4_figure_supplement_1.pdf]

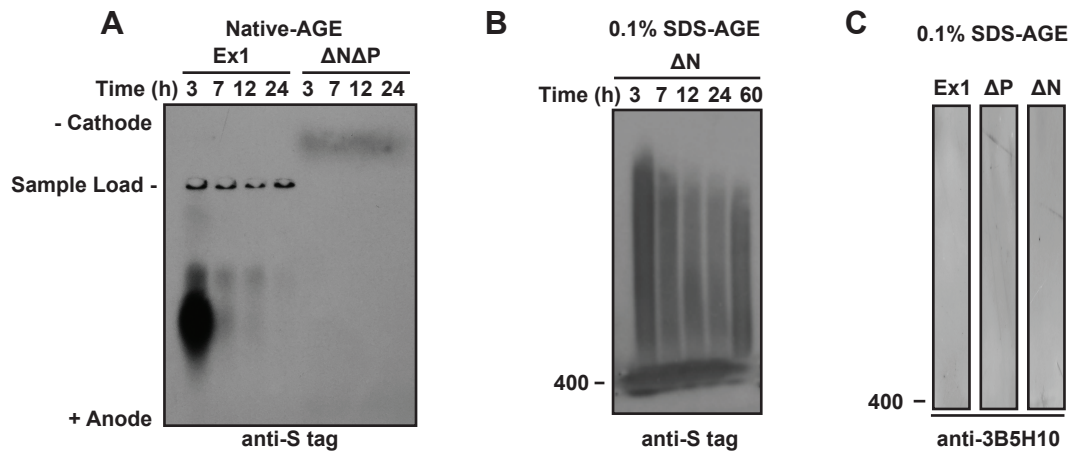

**Figure 4 - figure supplement 1: Native-AGE and 0.1% SDS, respectively, of ΔN and ΔNΔP oligomers**

**A.** ΔNΔP forms large aggregates as early as 3h that migrate towards the cathode in these native AGE gel system.

**B.** SDS-soluble ΔN oligomers persist over 60h aggregation as shown by 0.1% SDS-AGE gel and immunoblotted for the C-terminal S-tag. ΔN oligomers remain soluble even when aggregation has saturated

**C.** Recombinantly purified mHtt-Ex1 variants run in 0.1% SDS-AGE gels and immunoprobed with the 3B5H10 conformational antibody.
