# Supplementary material for: Control of the structural landscape and neuronal proteotoxicity of mutant Huntingtin by domains flanking the polyQ tract
Source: eLife journal article supplement (doi:10.7554/elife.18065), 2016-10-18
Supplement: supp [file elife_poa_e18065_Figure_5_figure_supplement_1.pdf › elife_poa_e18065_Figure_5_figure_supplement_1.pdf]

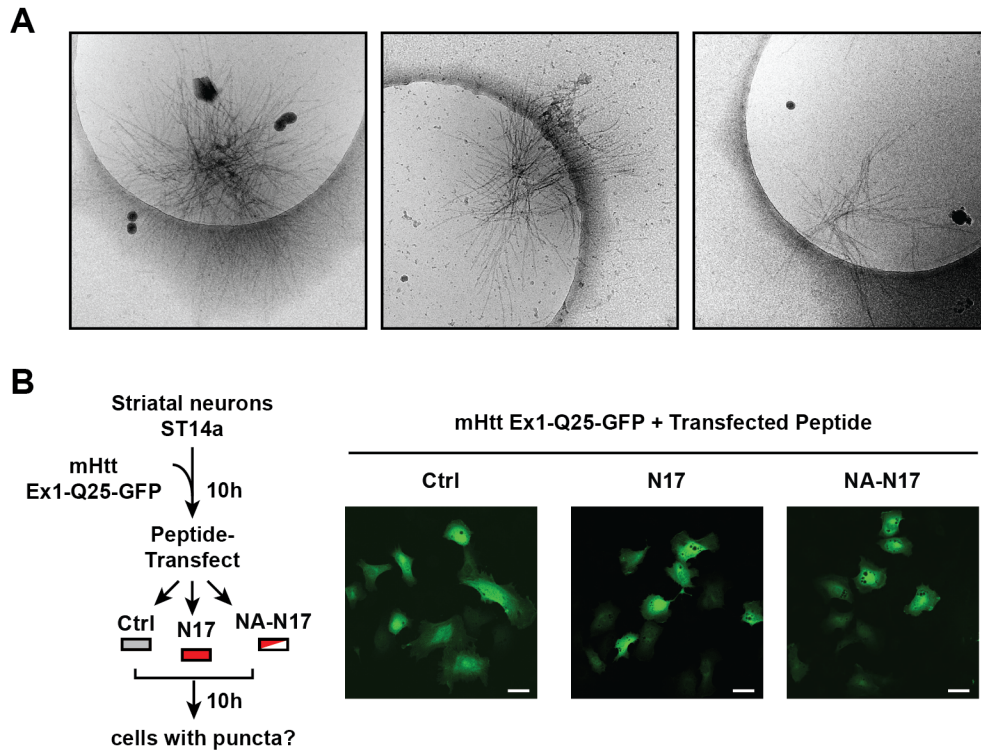

**Figure 5 - figure supplement 1: *Trans* addition of N17 bundles  $\Delta$ N fibrils**

A. Cryo-EM image of  $\Delta$ N fibers with 12.5x fold excess N17 added when  $\Delta$ N aggregation was initiated. Images were taken 60h after initiation of aggregation. Scale bar is 500 nm.

B. Fluorescence microscopy of ST14a striatal neurons transfected with mHtt-Ex1-Q25-GFP and N17 variant peptides. No puncta were seen in any transfection condition. Scale bar is 40  $\mu$ m.
