# Supplementary material for: Control of the structural landscape and neuronal proteotoxicity of mutant Huntingtin by domains flanking the polyQ tract
Source: eLife journal article supplement (doi:10.7554/elife.18065), 2016-10-18
Supplement: supp [file elife_poa_e18065_Figure_6_figure_supplement_1.pdf › elife_poa_e18065_Figure_6_figure_supplement_1.pdf]

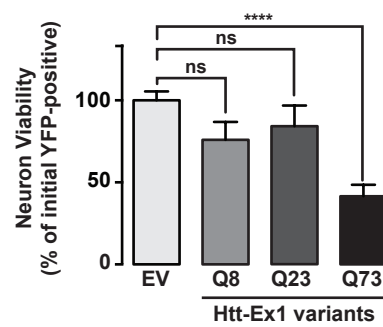

**Figure 6 - figure supplement 1: Compromised viability in Htt-Ex1 transfected MSNs is dependent on pathogenic polyQ expansion.**

Relative viability of MSNs transfected with Htt-Ex1 variants with both pathogenic and non-pathogenic polyQ lengths. Data are mean  $\pm$  SEM. \*\*\*\* $p < 0.0001$
