# Supplementary material for: Control of the structural landscape and neuronal proteotoxicity of mutant Huntingtin by domains flanking the polyQ tract
Source: eLife journal article supplement (doi:10.7554/elife.18065), 2016-10-18
Supplement: supp [file elife_poa_e18065_Figure_7_figure_supplement_1.pdf › elife_poa_e18065_Figure_7_figure_supplement_1.pdf]

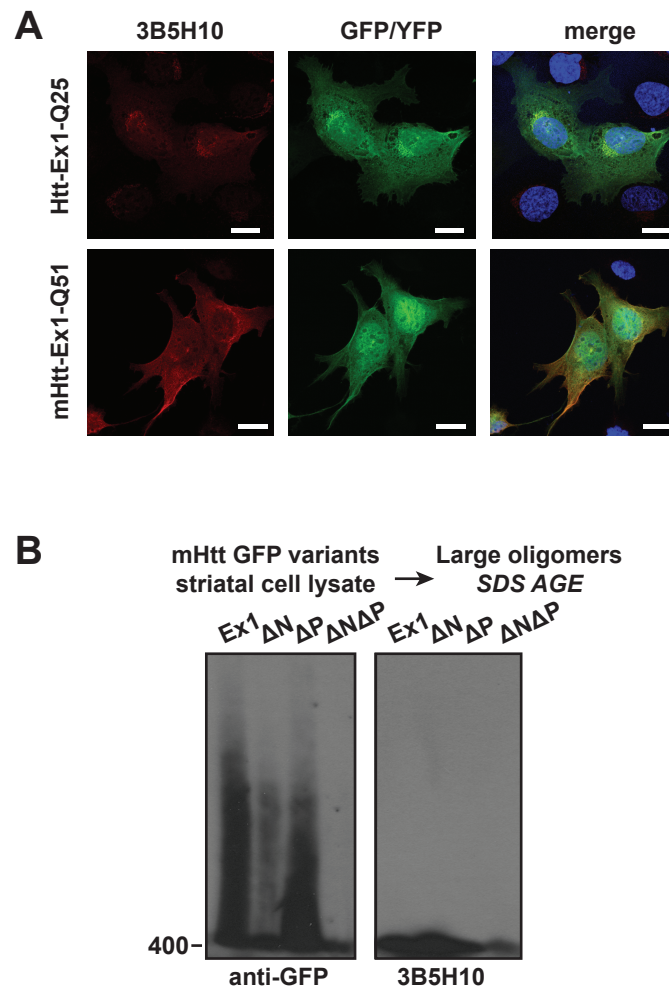

**Figure 7 - figure supplement 1: 3B5H10 does not recognize large oligomers of mHtt variants and non-pathogenic polyQ-length Htt**

**A.** *Top row:* Confocal imaging of ST14a striatal-derived neurons transfected with Htt-Ex1-Q25 C-terminally tagged with YFP. Cells were imaged in the YFP channel and immunostained with 3B5H10. *Bottom row:* GFP and 3B5H10 immunostained imaging of ST14a neurons transfected with mHtt-Ex1-Q51 C-terminally tagged with GFP, as shown in Figure 7A, is shown for reference. Scale bar is 20  $\mu$ m.

**B.** Lysates of striatal cells transfected with mHtt-Ex1 variants run in 0.1% SDS-AGE gels and immunoprobed with 3B5H10. Similar to as was seen *in vitro*, 3B5H10 has no reactivity with these large oligomeric species.
